# Supplementary material for: Identification and Functional Characterization of the Gene Cluster Responsible for Fusaproliferin Biosynthesis in Fusarium proliferatum
Source: MDPI journal article supplement (doi:10.3390/toxins13070468), 2021-07-06
Supplement: s1 [file s1]

# Supplementary Materials: Identification and functional characterization of the gene cluster responsible for fusaproliferin biosynthesis in *Fusarium proliferatum*

Asja Čeranić, Thomas Svoboda, Franz Berthiller, Michael Sulyok, Jonathan Samson, Ulrich Güldener, Rainer Schuhmacher and Gerhard Adam

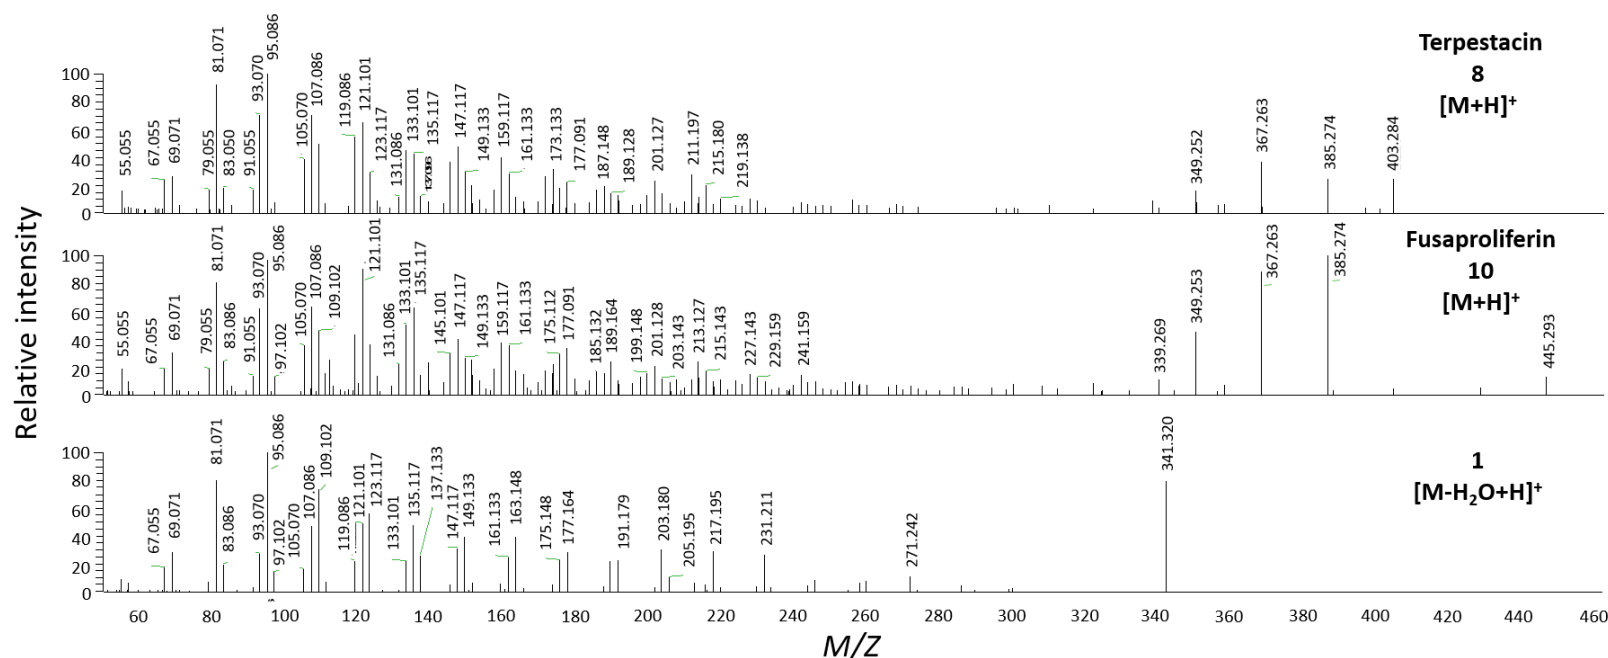

Figure S1. Supplementary Overview of the fragmentation spectra used for the molecular networking in Figure 4.

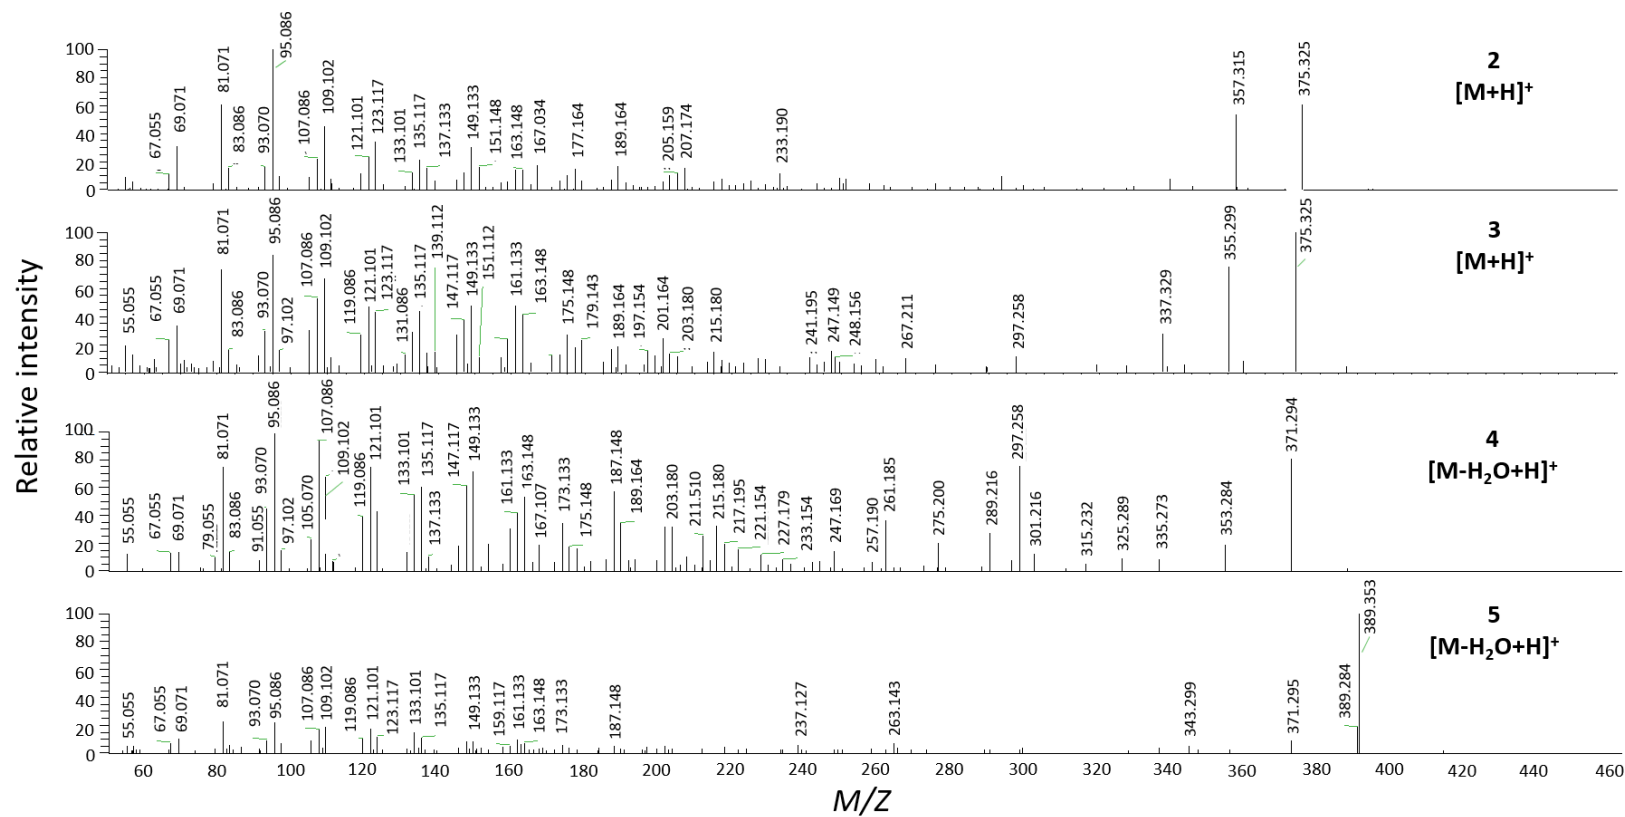

Figure S2. Supplementary Overview of the fragmentation spectra used for the molecular networking in Figure 4.

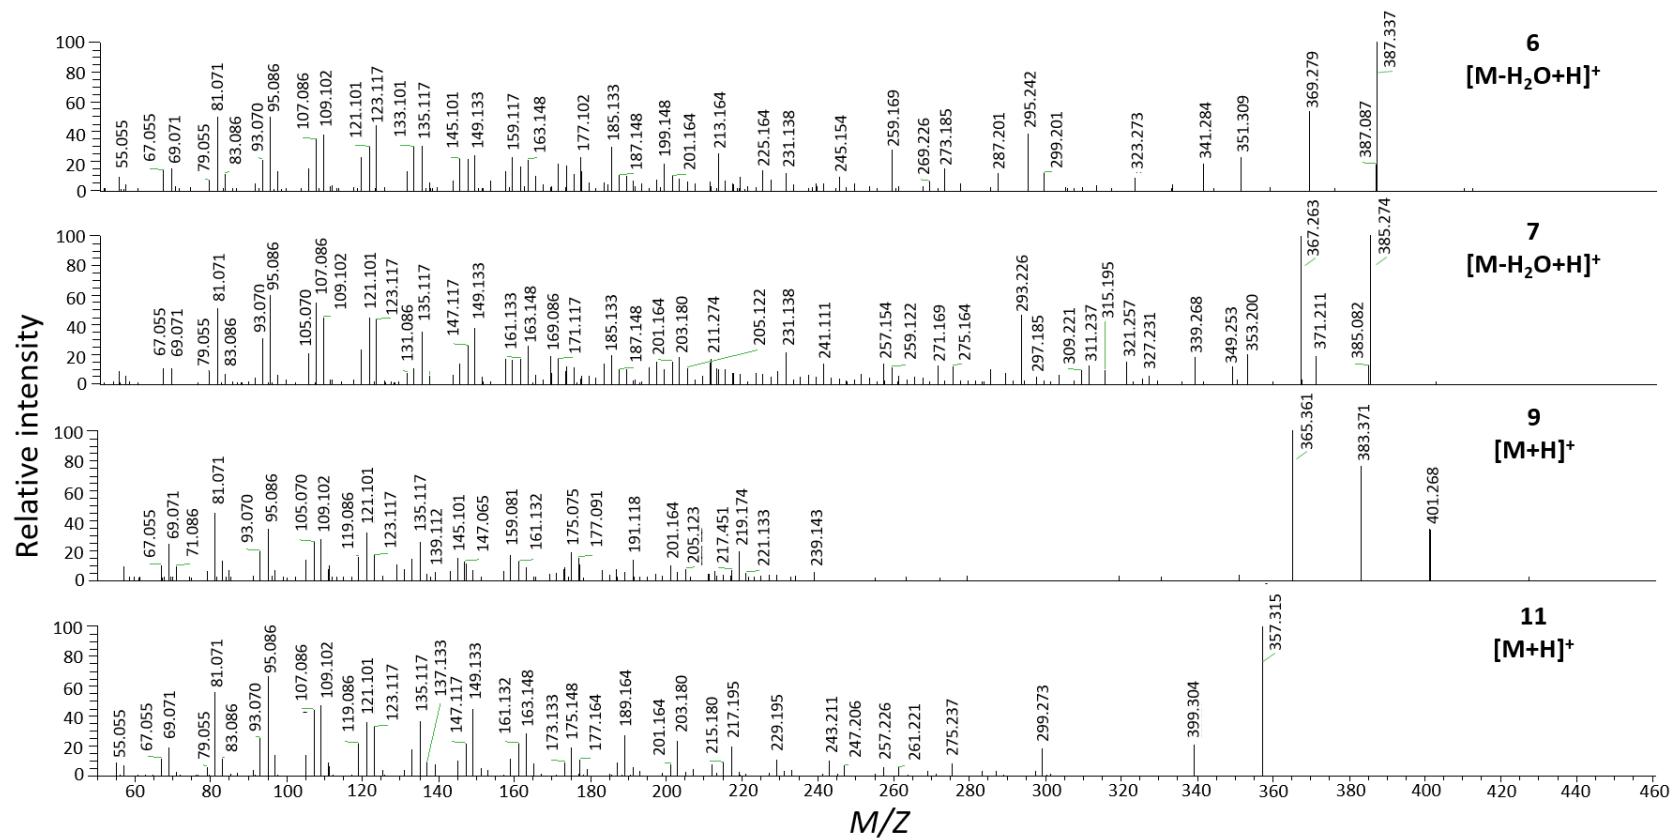

Figure S1. Supplementary Overview of the fragmentation spectra used for the molecular networking in Figure 4.

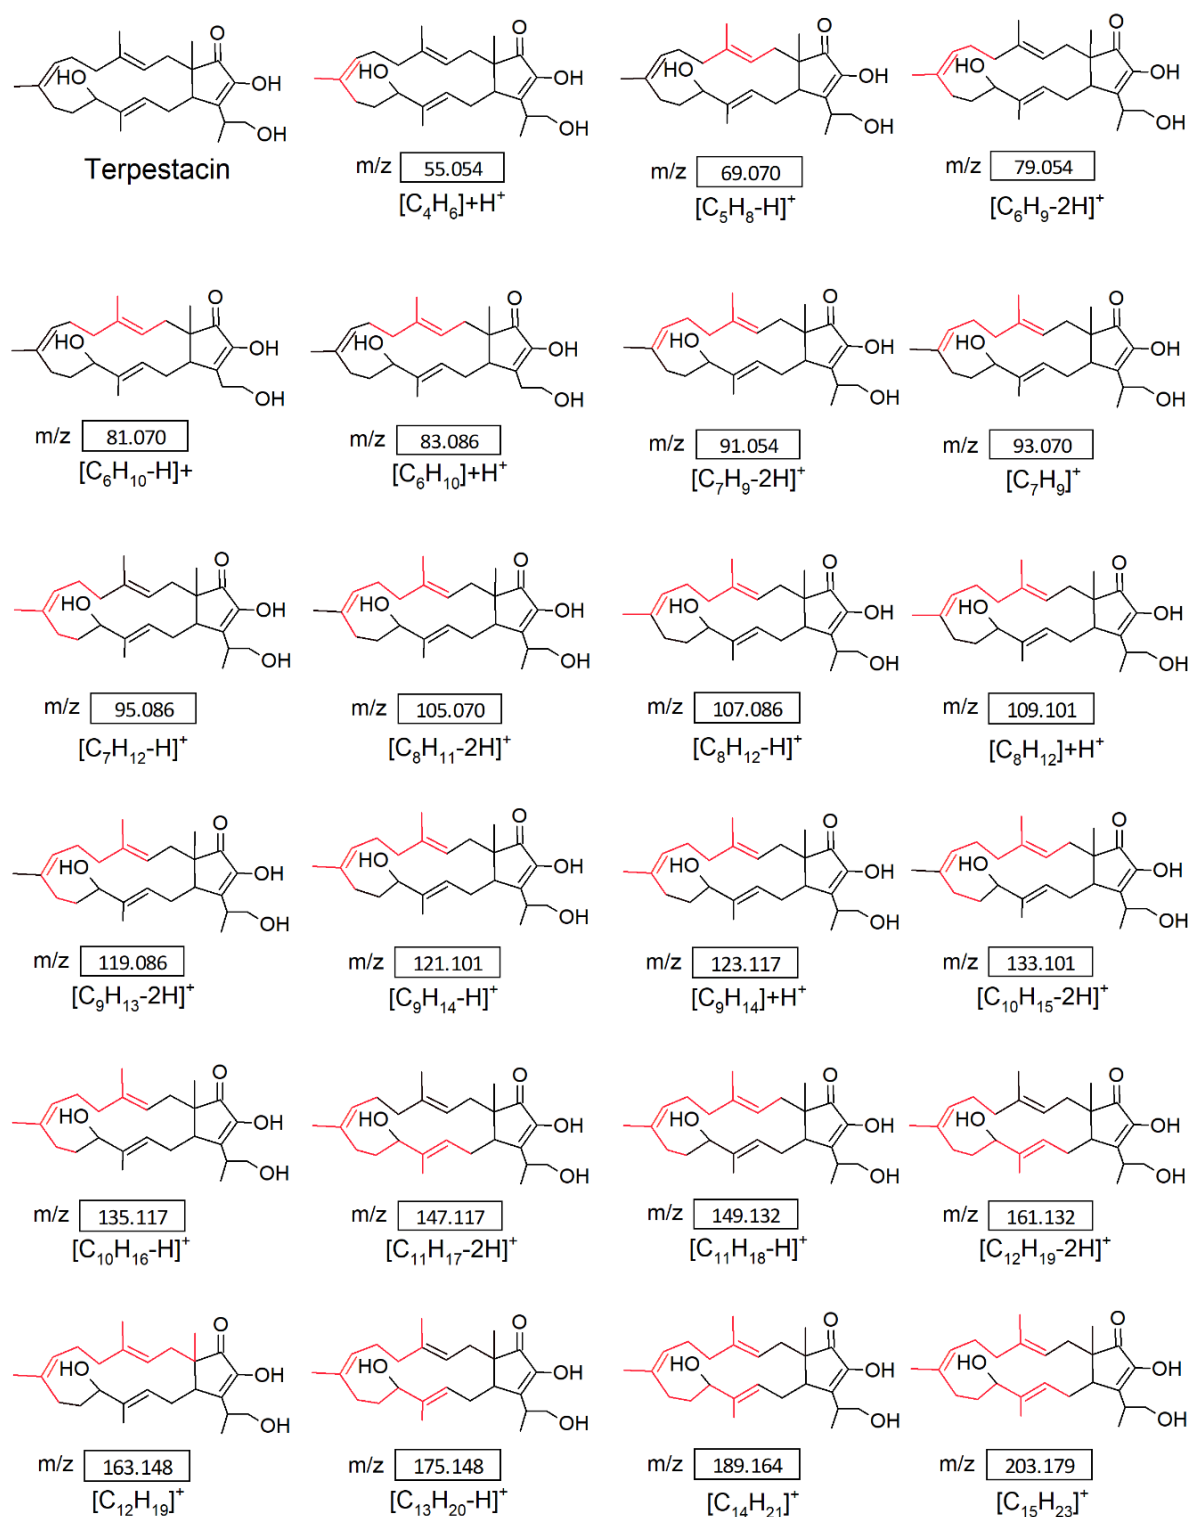

**Figure S4.** m/z of intense peaks commonly found in the MS2 of all target and suspect compounds. On the example of terpestacin (TPC), the fragment formula for the respective m/z was generated via MetFrag and those structure parts which match the fragment formula are represented in red.
